# Supplementary material
Source: publisher site journal article supplement (https://www.dovepress.com/article/353412)

**Figure A1. A. Product Attributes Associated with Taking Exactly as Directed: Relative Preference Weight. B. Drivers of Overall Product Choice: Relative Preference Weight. C. Drivers of Less Anxiety/Stress: Relative Preference Weight.**

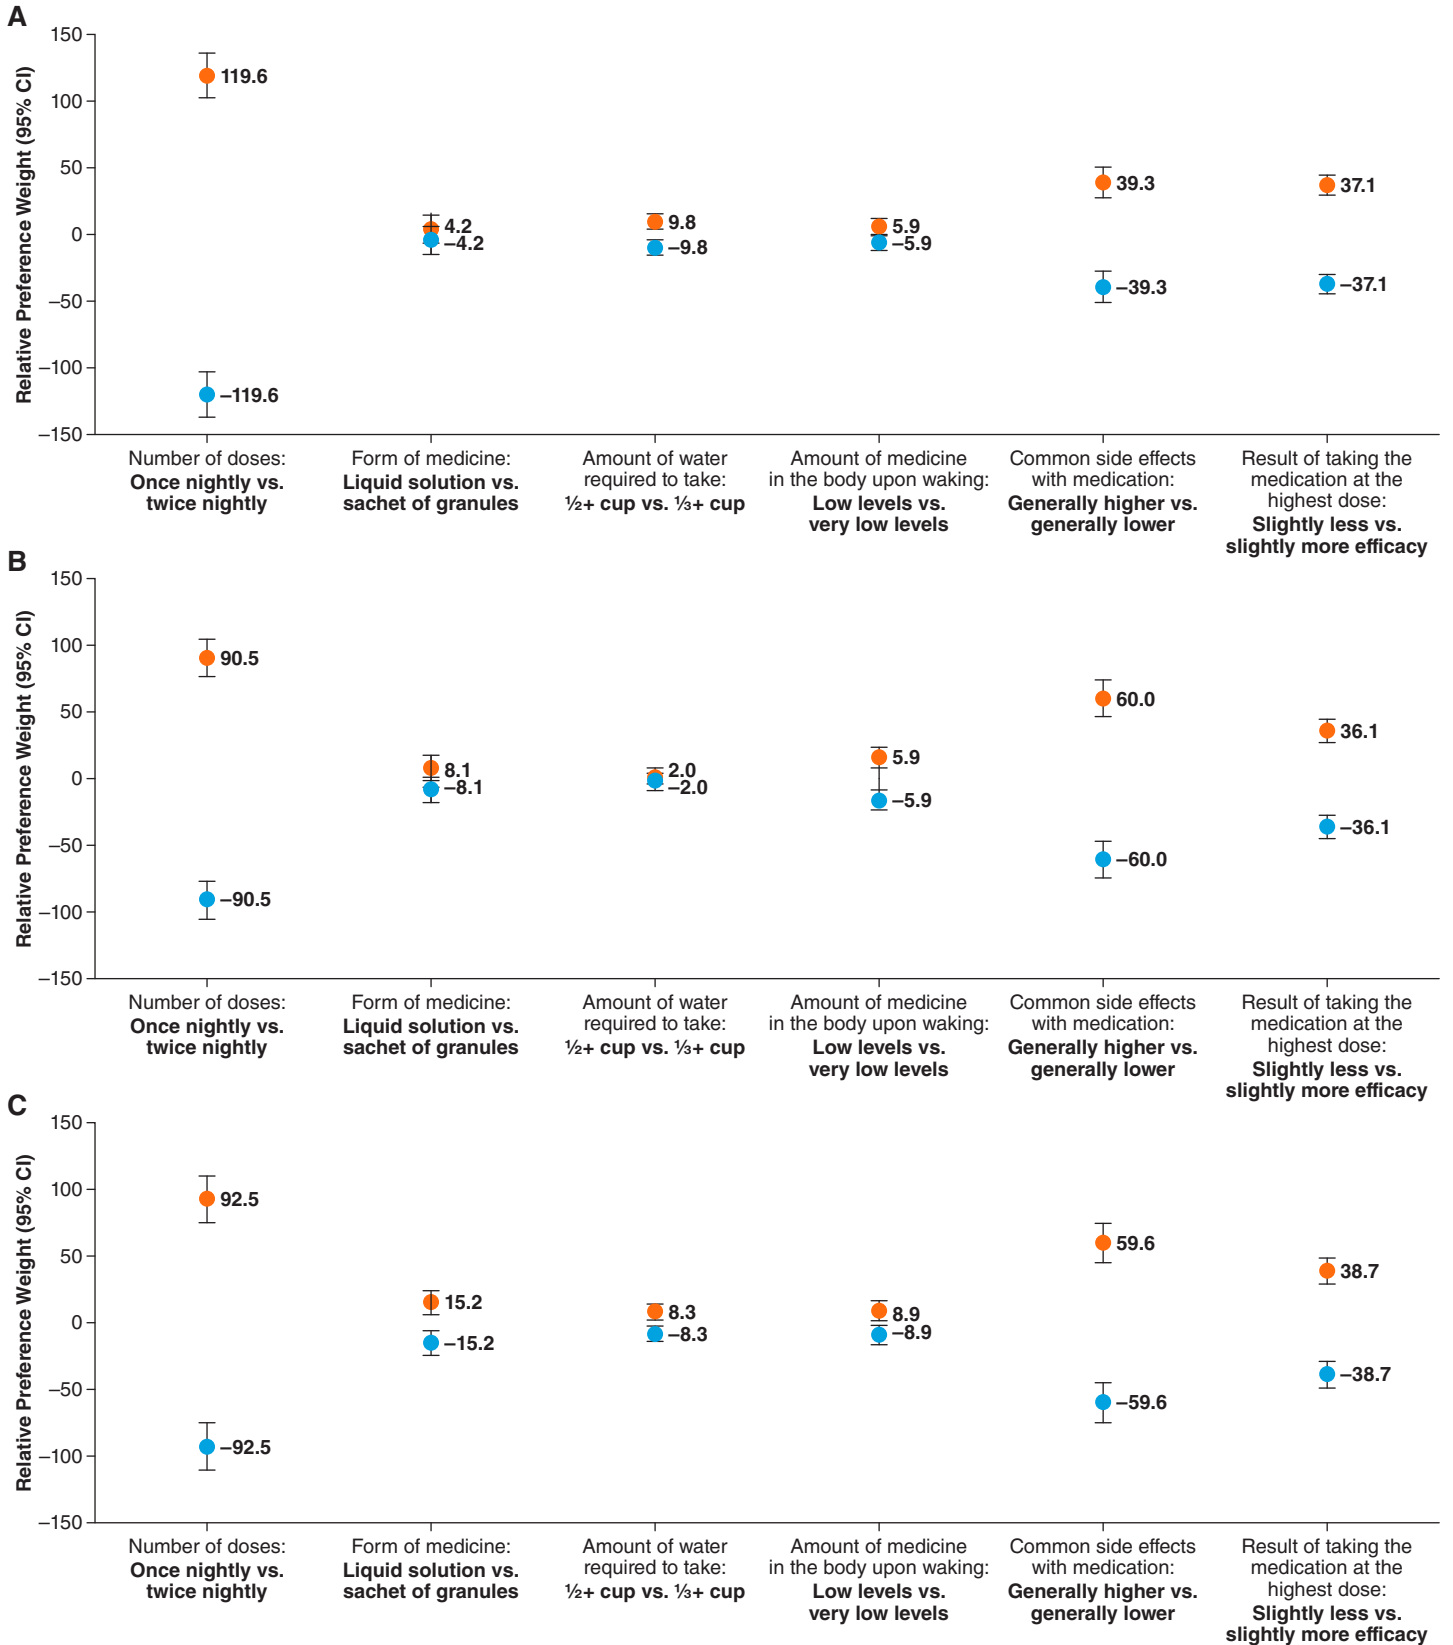

Supplement: Supplementary file 1 [file get_supplementary_file.php]
